# Supplementary material
Source: Springer Nature journal article supplement (https://www.springermedizin.de/resource/supplementary/13031_2011_86_MOESM2_ESM.pdf/9645070)

# Supplementary and Therapeutic Feeding Program Enrollment, 2007-2009<sup>\*</sup>

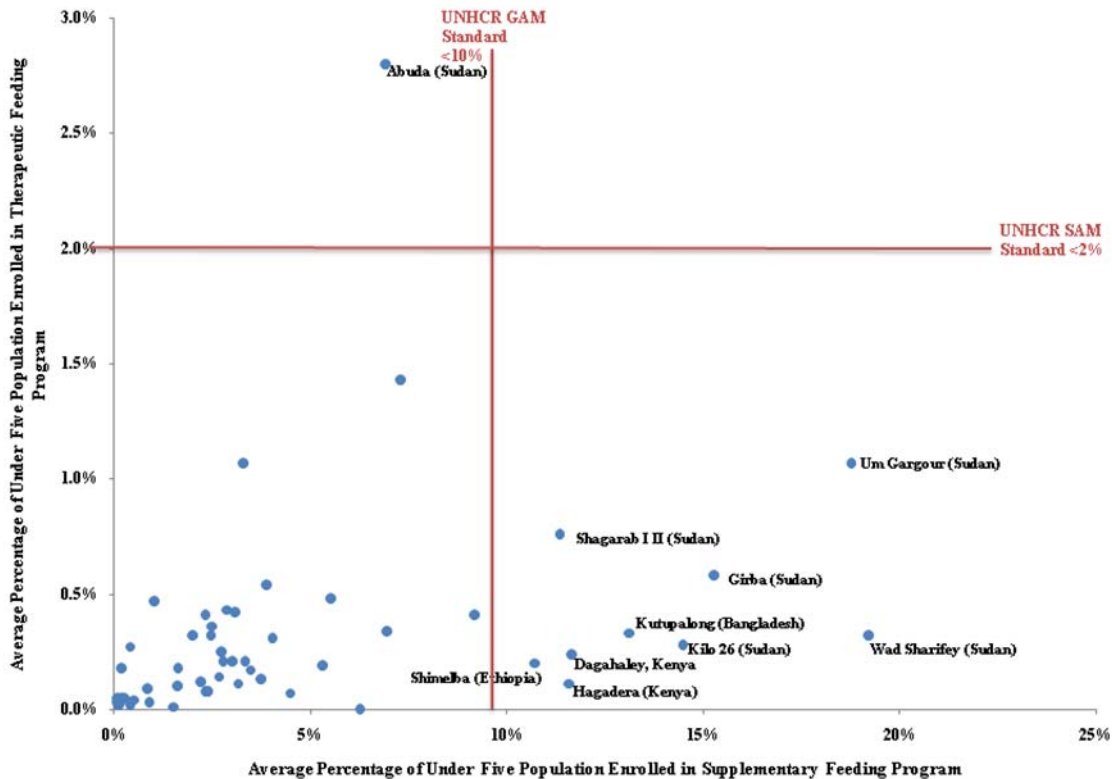

Supplement: MOESM2 [file 9645070]
